# Supplementary material for: Synthesis and Characterization of Monometallic (Ag, Cu) and Bimetallic Ag-Cu Particles for Antibacterial and Antifungal Applications
Source: Hindawi journal article supplement (doi:10.1155/2016/2187940), 2016-01-01
Supplement: f1 [file 2187940.f1.pdf]

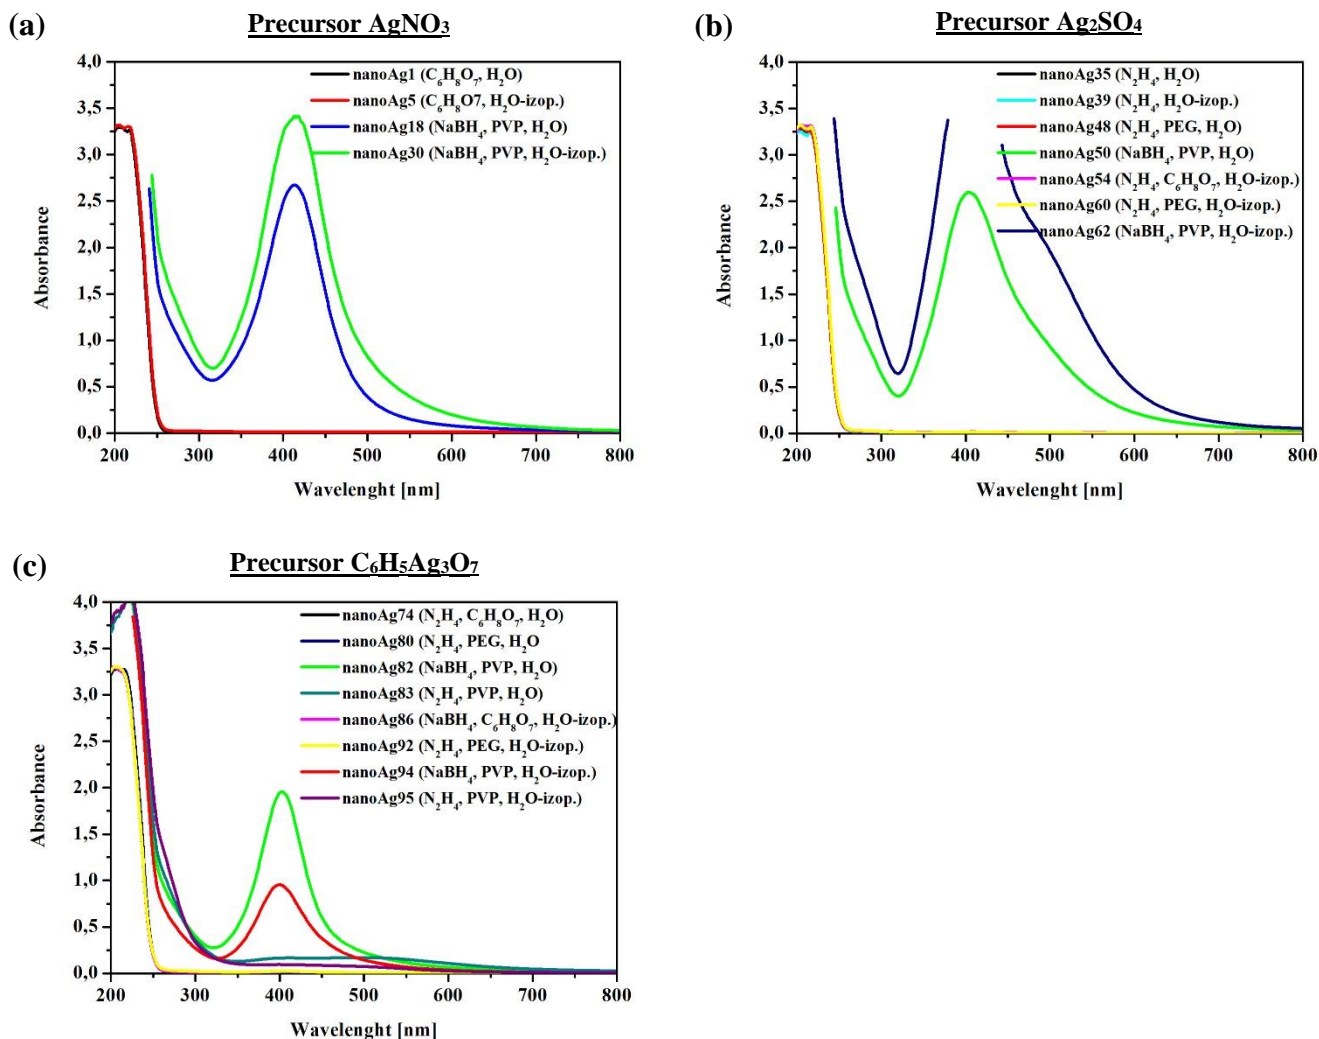

Fig 1. Diffuse reflectance spectra of silver nanoparticles obtained by using different precursors: (a)  $\text{AgNO}_3$ , (b)  $\text{Ag}_2\text{SO}_4$ , (c)  $\text{C}_6\text{H}_5\text{Ag}_3\text{O}_7$ .

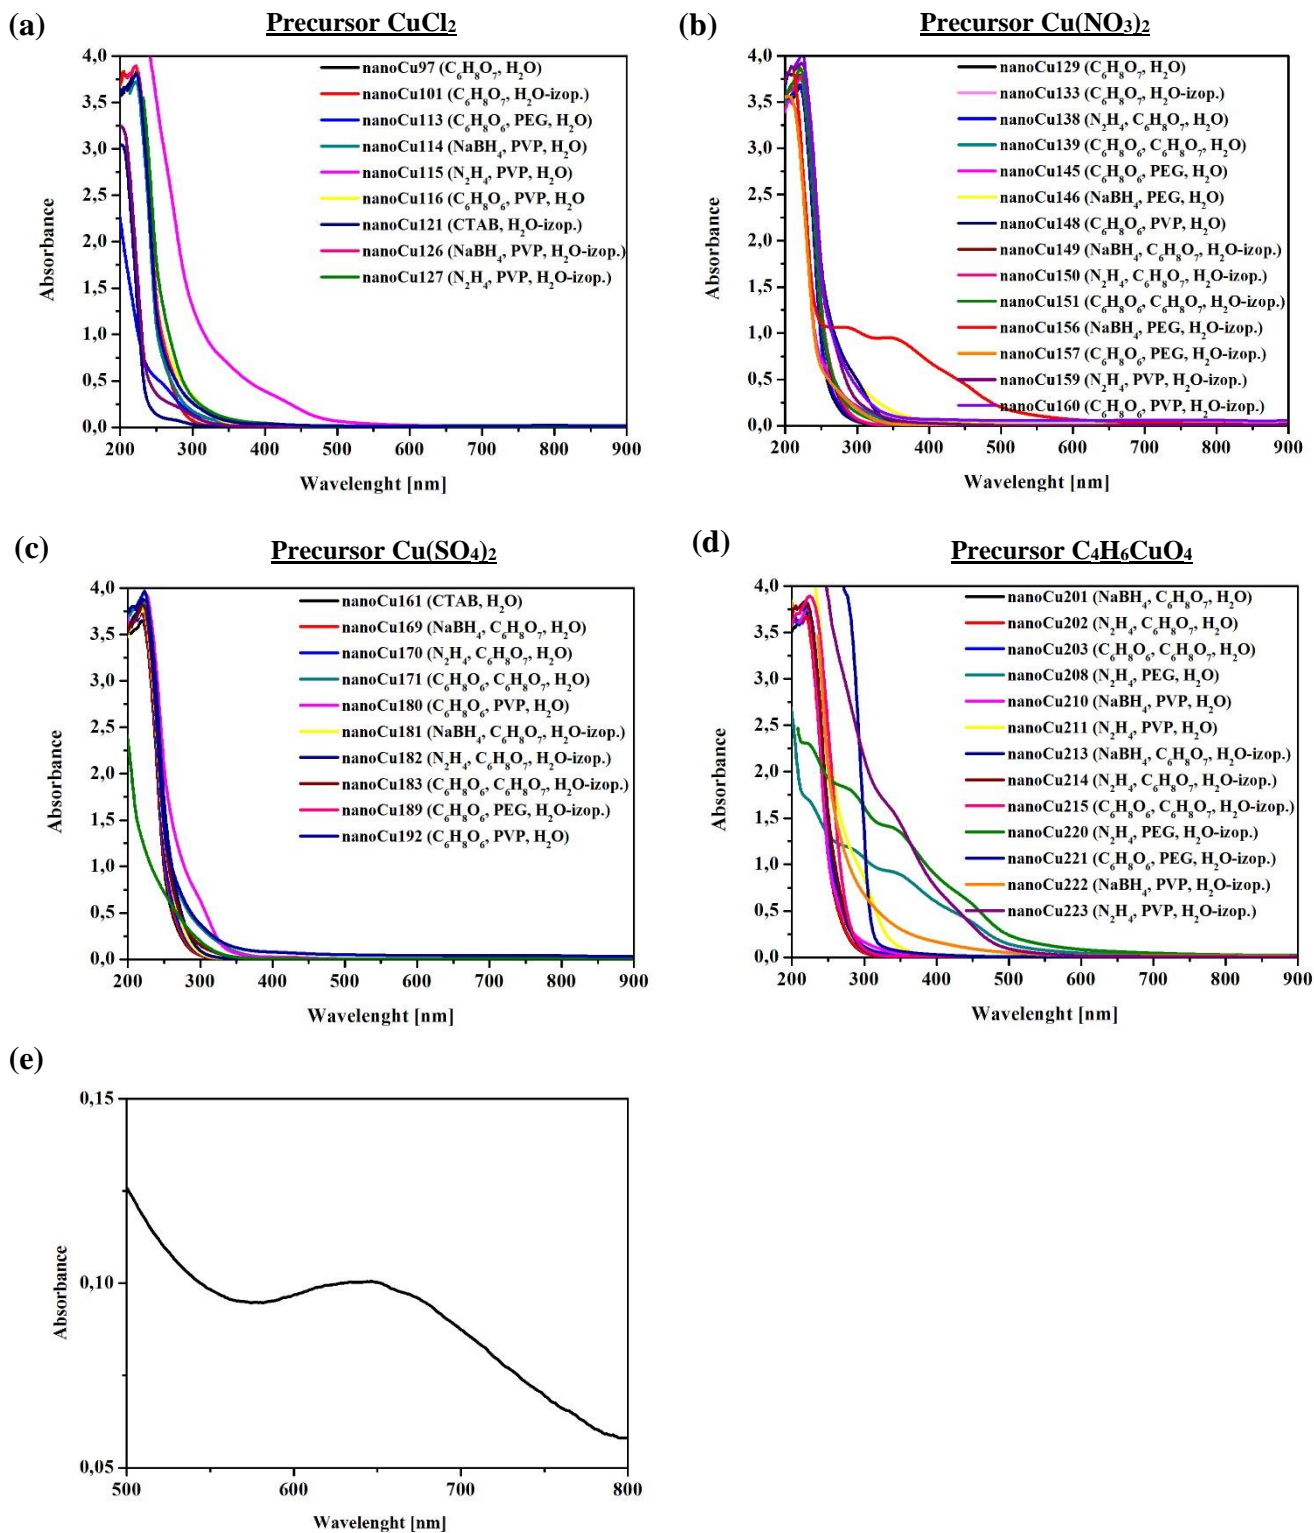

Fig. 2 Diffuse reflectance spectra of copper nanoparticles obtained by using different precursors: (a)  $\text{CuCl}_2$ , (b)  $\text{Cu}(\text{NO}_3)_2$ , (c)  $\text{Cu}(\text{SO}_4)_2$ , (d)  $\text{C}_4\text{H}_6\text{CuO}_4$ , (e) characteristic peak of the copper nanoparticles prepared with  $\text{C}_4\text{H}_6\text{CuO}_4$ .

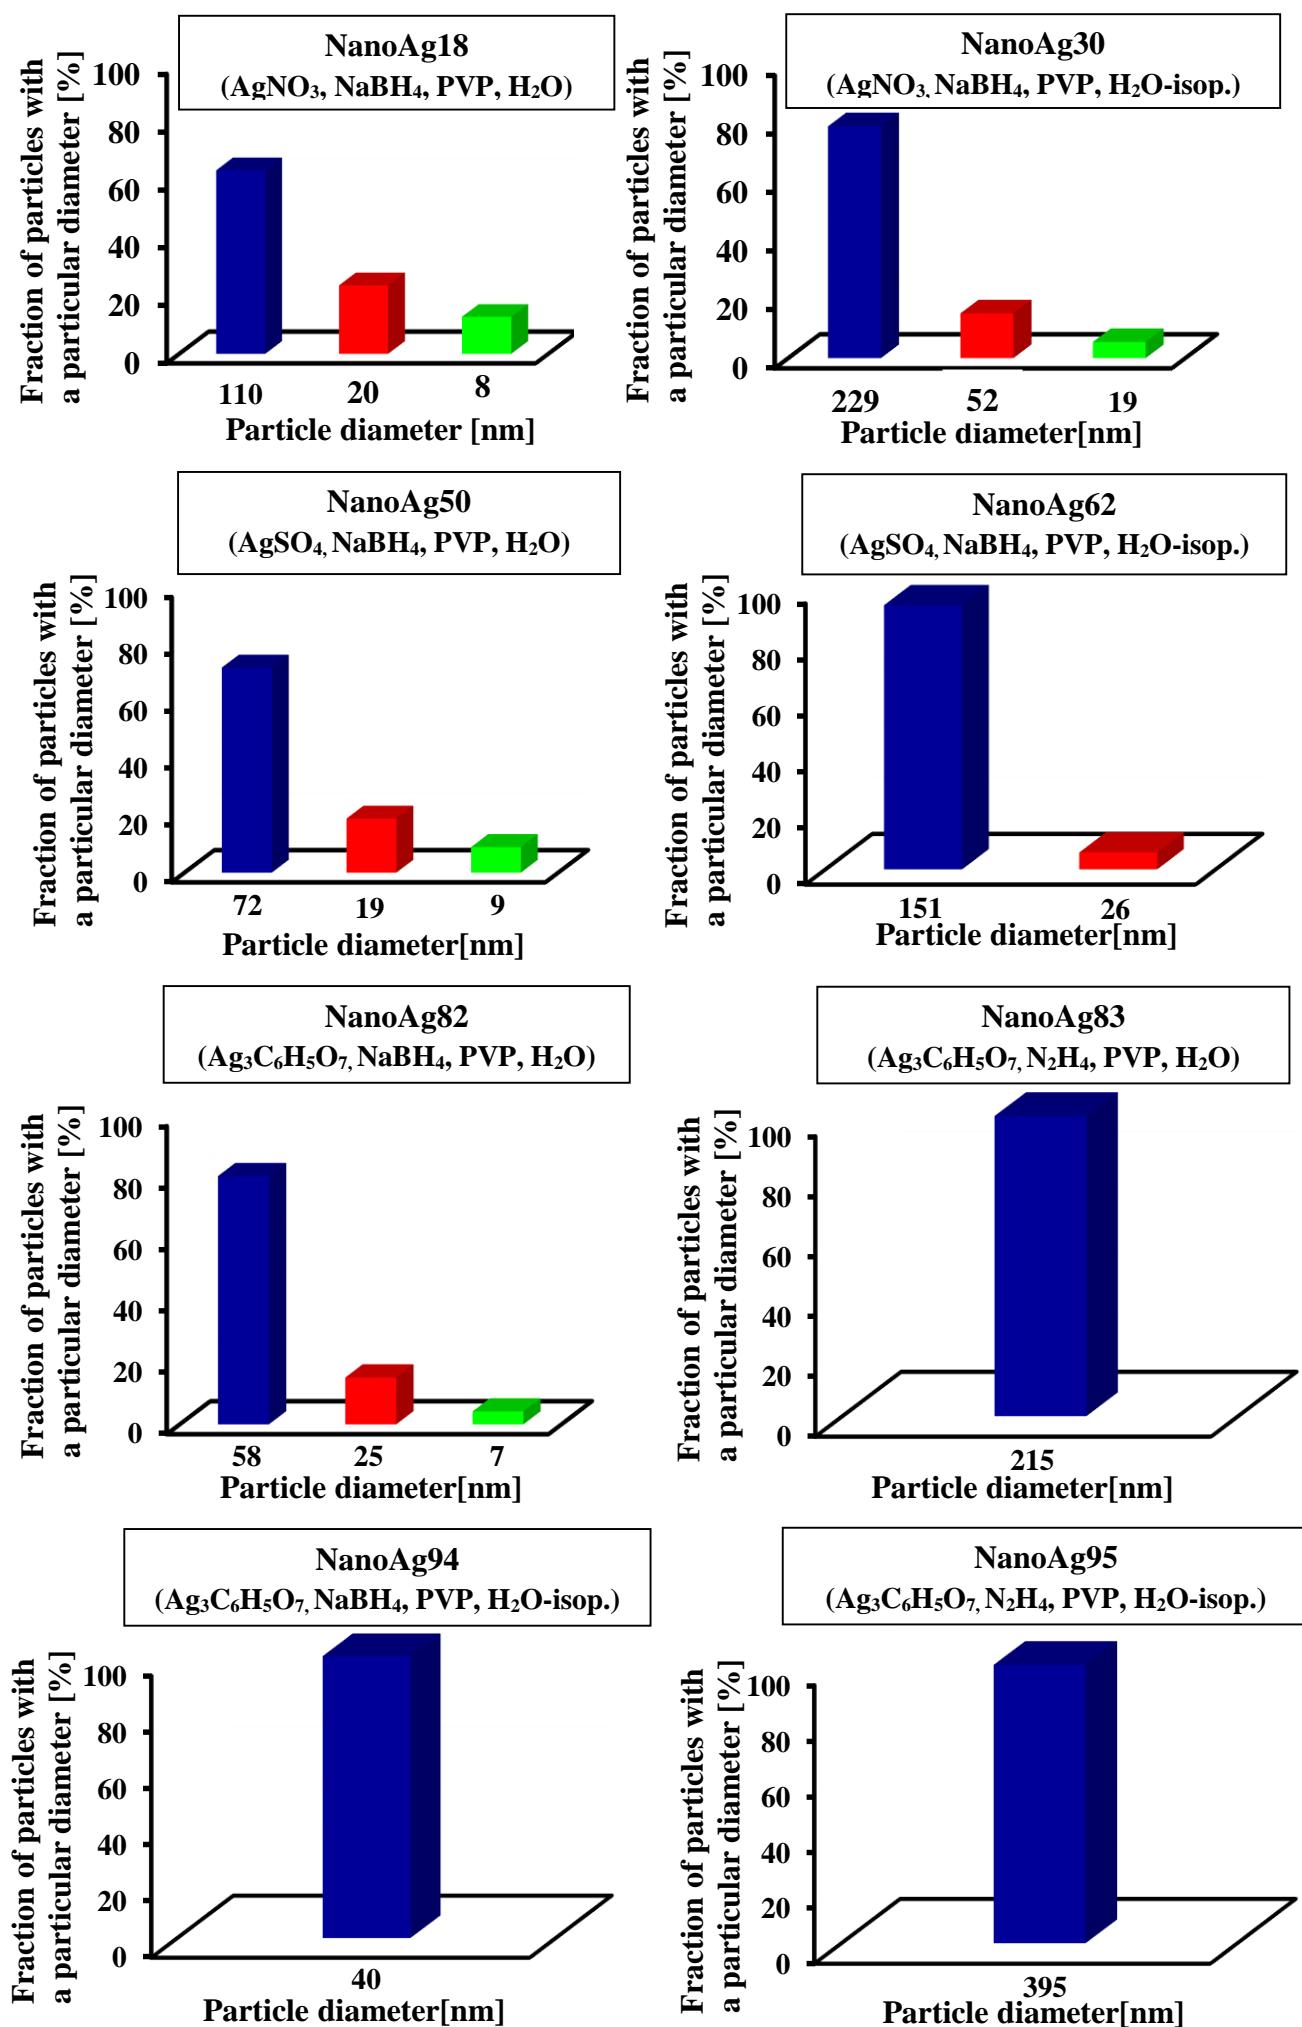

Fig 3. Particle size distribution of silver nanoparticles.

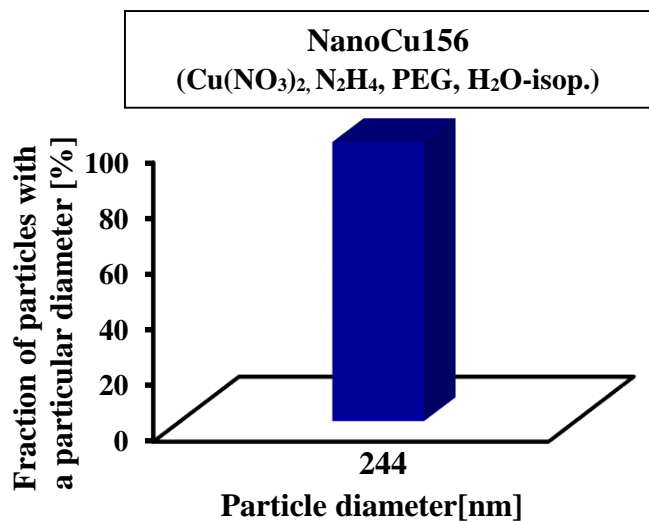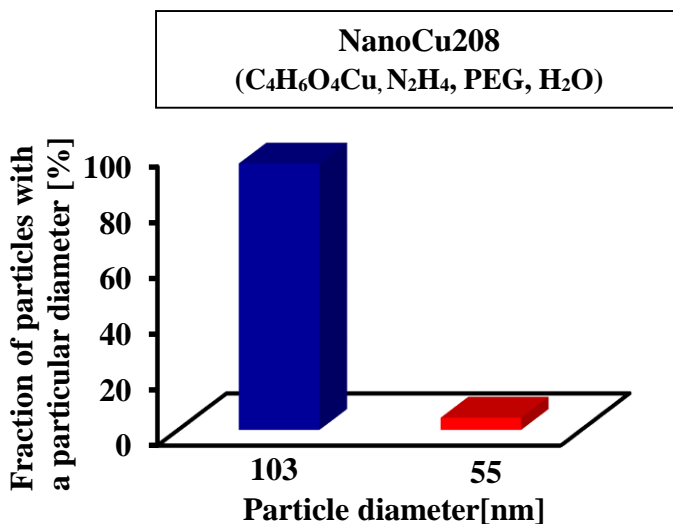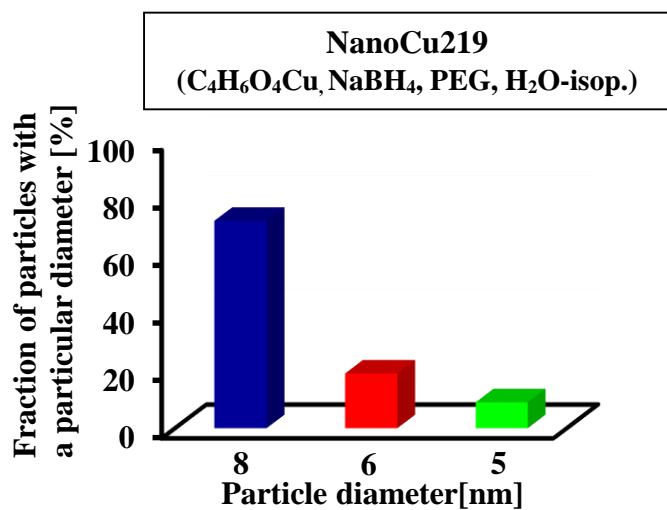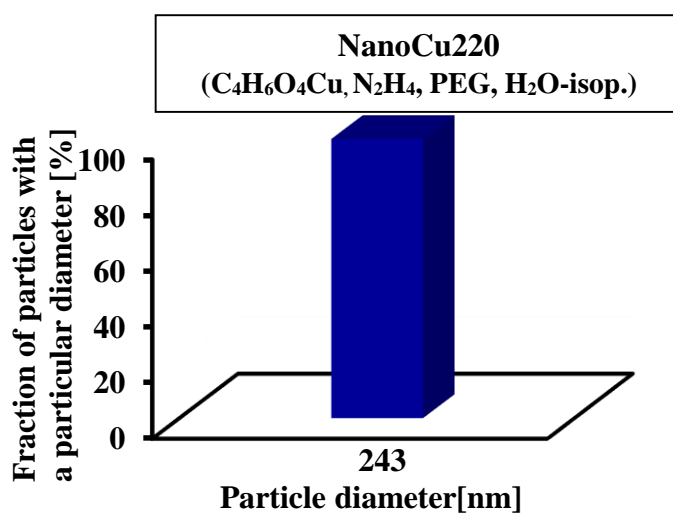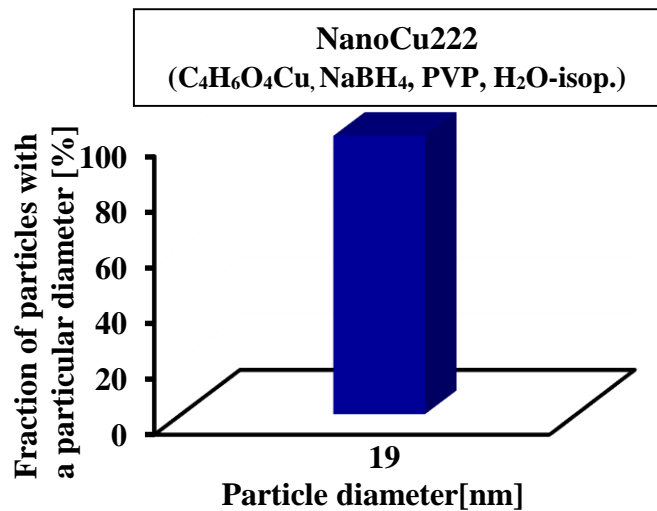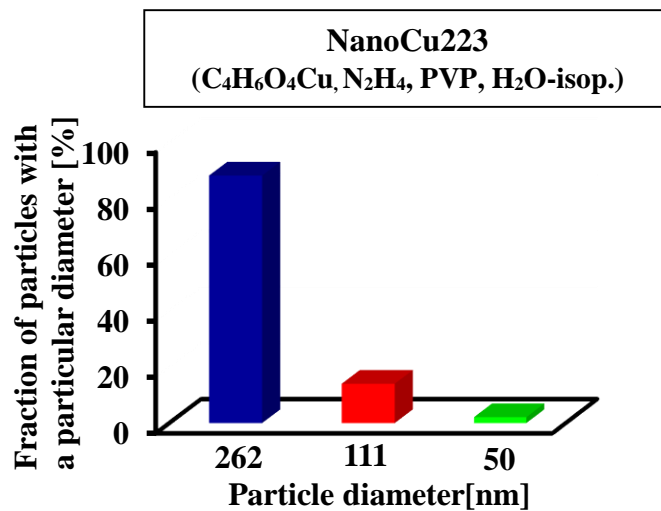

Fig 4. Particle size distribution of copper nanoparticles.

Table 1. The composition and stability of the solutions containing silver or copper in an ionic form or nanoparticles (monometallic solutions)

| Sample label | Silver precursor  |                                 |                                                              | Copper precursor  |                                   |                   |                                                 | Reducing agent    |                               |                                              | Stabilizer |                                              |     |     | Solvent          |            | Stability |
|--------------|-------------------|---------------------------------|--------------------------------------------------------------|-------------------|-----------------------------------|-------------------|-------------------------------------------------|-------------------|-------------------------------|----------------------------------------------|------------|----------------------------------------------|-----|-----|------------------|------------|-----------|
|              | AgNO <sub>3</sub> | Ag <sub>2</sub> SO <sub>4</sub> | Ag <sub>3</sub> C <sub>6</sub> H <sub>5</sub> O <sub>7</sub> | CuCl <sub>2</sub> | Cu(NO <sub>3</sub> ) <sub>2</sub> | CuSO <sub>4</sub> | C <sub>4</sub> H <sub>6</sub> O <sub>4</sub> Cu | NaBH <sub>4</sub> | N <sub>2</sub> H <sub>4</sub> | C <sub>6</sub> H <sub>8</sub> O <sub>6</sub> | CTAB       | C <sub>6</sub> H <sub>8</sub> O <sub>7</sub> | PEG | PVP | H <sub>2</sub> O | 2-propanol |           |
| nanoAg1      | X                 |                                 |                                                              |                   |                                   |                   |                                                 |                   |                               |                                              |            | X                                            |     |     | X                |            | stable    |
| nanoAg2      | X                 |                                 |                                                              |                   |                                   |                   |                                                 | X                 |                               |                                              |            |                                              |     |     | X                |            | -         |
| nanoAg3      | X                 |                                 |                                                              |                   |                                   |                   |                                                 |                   | X                             |                                              |            |                                              |     |     | X                |            | -         |
| nanoAg4      | X                 |                                 |                                                              |                   |                                   |                   |                                                 |                   |                               | X                                            |            |                                              |     |     | X                |            | -         |
| nanoAg5      | X                 |                                 |                                                              |                   |                                   |                   |                                                 |                   |                               |                                              |            | X                                            |     |     |                  | X          | stable    |
| nanoAg6      | X                 |                                 |                                                              |                   |                                   |                   |                                                 | X                 |                               |                                              |            |                                              |     |     |                  | X          | -         |
| nanoAg7      | X                 |                                 |                                                              |                   |                                   |                   |                                                 |                   | X                             |                                              |            |                                              |     |     |                  | X          | -         |
| nanoAg8      | X                 |                                 |                                                              |                   |                                   |                   |                                                 |                   |                               | X                                            |            |                                              |     |     |                  | X          | -         |
| nanoAg9      | X                 |                                 |                                                              |                   |                                   |                   |                                                 | X                 |                               |                                              |            | X                                            |     |     | X                |            | -         |
| nanoAg10     | X                 |                                 |                                                              |                   |                                   |                   |                                                 |                   | X                             |                                              |            | X                                            |     |     | X                |            | -         |
| nanoAg11     | X                 |                                 |                                                              |                   |                                   |                   |                                                 |                   |                               | X                                            |            | X                                            |     |     | X                |            | -         |
| nanoAg12     | X                 |                                 |                                                              |                   |                                   |                   |                                                 |                   |                               |                                              | X          |                                              |     |     | X                |            | -         |
| nanoAg13     | X                 |                                 |                                                              |                   |                                   |                   |                                                 |                   |                               |                                              | X          |                                              |     |     | X                |            | -         |
| nanoAg14     | X                 |                                 |                                                              |                   |                                   |                   |                                                 |                   |                               |                                              | X          |                                              |     |     | X                |            | -         |
| nanoAg15     | X                 |                                 |                                                              |                   |                                   |                   |                                                 | X                 |                               |                                              |            |                                              | X   |     | X                |            | -         |
| nanoAg16     | X                 |                                 |                                                              |                   |                                   |                   |                                                 |                   | X                             |                                              |            |                                              | X   |     | X                |            | -         |
| nanoAg17     | X                 |                                 |                                                              |                   |                                   |                   |                                                 |                   |                               | X                                            |            |                                              | X   |     | X                |            | -         |
| nanoAg18     | X                 |                                 |                                                              |                   |                                   |                   |                                                 | X                 |                               |                                              |            |                                              |     | X   | X                |            | stable    |
| nanoAg19     | X                 |                                 |                                                              |                   |                                   |                   |                                                 |                   | X                             |                                              |            |                                              |     | X   | X                |            | -         |
| nanoAg20     | X                 |                                 |                                                              |                   |                                   |                   |                                                 |                   |                               | X                                            |            |                                              |     | X   | X                |            | -         |
| nanoAg21     | X                 |                                 |                                                              |                   |                                   |                   |                                                 | X                 |                               |                                              |            | X                                            |     |     |                  | X          | -         |
| nanoAg22     | X                 |                                 |                                                              |                   |                                   |                   |                                                 |                   | X                             |                                              |            | X                                            |     |     |                  | X          | -         |
| nanoAg23     | X                 |                                 |                                                              |                   |                                   |                   |                                                 |                   |                               | X                                            |            | X                                            |     |     |                  | X          | -         |
| nanoAg24     | X                 |                                 |                                                              |                   |                                   |                   |                                                 |                   |                               |                                              | X          |                                              |     |     |                  | X          | -         |
| nanoAg25     | X                 |                                 |                                                              |                   |                                   |                   |                                                 |                   |                               |                                              | X          |                                              |     |     |                  | X          | -         |
| nanoAg26     | X                 |                                 |                                                              |                   |                                   |                   |                                                 |                   |                               |                                              | X          |                                              |     |     |                  | X          | -         |
| nanoAg27     | X                 |                                 |                                                              |                   |                                   |                   |                                                 | X                 |                               |                                              |            |                                              | X   |     |                  | X          | -         |

Tabele 1. The composition and stability of the solutions containing silver or copper in an ionic form or nanoparticles (monometallic solutions), cont.

| Sample label | Silver precursor  |                                 |                                                              | Copper precursor  |                                   |                   |                                                 | Reducing agent    |                               |                                              | Stabilizer |                                              |     |     | Solvent          |            | Stability |
|--------------|-------------------|---------------------------------|--------------------------------------------------------------|-------------------|-----------------------------------|-------------------|-------------------------------------------------|-------------------|-------------------------------|----------------------------------------------|------------|----------------------------------------------|-----|-----|------------------|------------|-----------|
|              | AgNO <sub>3</sub> | Ag <sub>2</sub> SO <sub>4</sub> | Ag <sub>3</sub> C <sub>6</sub> H <sub>5</sub> O <sub>7</sub> | CuCl <sub>2</sub> | Cu(NO <sub>3</sub> ) <sub>2</sub> | CuSO <sub>4</sub> | C <sub>4</sub> H <sub>6</sub> O <sub>4</sub> Cu | NaBH <sub>4</sub> | N <sub>2</sub> H <sub>4</sub> | C <sub>6</sub> H <sub>8</sub> O <sub>6</sub> | CTAB       | C <sub>6</sub> H <sub>8</sub> O <sub>7</sub> | PEG | PVP | H <sub>2</sub> O | 2-propanol |           |
| nanoAg28     | X                 |                                 |                                                              |                   |                                   |                   |                                                 |                   | X                             |                                              |            |                                              | X   |     |                  | X          | -         |
| nanoAg29     | X                 |                                 |                                                              |                   |                                   |                   |                                                 |                   |                               | X                                            |            |                                              | X   |     |                  | X          | -         |
| nanoAg30     | X                 |                                 |                                                              |                   |                                   |                   |                                                 | X                 |                               |                                              |            |                                              |     | X   |                  | X          | stable    |
| nanoAg31     | X                 |                                 |                                                              |                   |                                   |                   |                                                 |                   | X                             |                                              |            |                                              |     | X   |                  | X          | -         |
| nanoAg32     | X                 |                                 |                                                              |                   |                                   |                   |                                                 |                   |                               | X                                            |            |                                              |     | X   |                  |            | -         |
| nanoAg33     |                   | X                               |                                                              |                   |                                   |                   |                                                 |                   |                               |                                              |            | X                                            |     |     | X                |            | -         |
| nanoAg34     |                   | X                               |                                                              |                   |                                   |                   |                                                 | X                 |                               |                                              |            |                                              |     |     | X                |            | -         |
| nanoAg35     |                   | X                               |                                                              |                   |                                   |                   |                                                 |                   | X                             |                                              |            |                                              |     |     | X                |            | stable    |
| nanoAg36     |                   | X                               |                                                              |                   |                                   |                   |                                                 |                   |                               | X                                            |            |                                              |     |     | X                |            | -         |
| nanoAg37     |                   | X                               |                                                              |                   |                                   |                   |                                                 |                   |                               |                                              |            | X                                            |     |     |                  | X          | -         |
| nanoAg38     |                   | X                               |                                                              |                   |                                   |                   |                                                 | X                 |                               |                                              |            |                                              |     |     |                  | X          | -         |
| nanoAg39     |                   | X                               |                                                              |                   |                                   |                   |                                                 |                   | X                             |                                              |            |                                              |     |     |                  | X          | stable    |
| nanoAg40     |                   | X                               |                                                              |                   |                                   |                   |                                                 |                   |                               | X                                            |            |                                              |     |     |                  | X          | -         |
| nanoAg41     |                   | X                               |                                                              |                   |                                   |                   |                                                 | X                 |                               |                                              |            | X                                            |     |     | X                |            | -         |
| nanoAg42     |                   | X                               |                                                              |                   |                                   |                   |                                                 |                   | X                             |                                              |            | X                                            |     |     | X                |            | -         |
| nanoAg43     |                   | X                               |                                                              |                   |                                   |                   |                                                 |                   |                               | X                                            |            | X                                            |     |     | X                |            | -         |
| nanoAg44     |                   | X                               |                                                              |                   |                                   |                   |                                                 |                   |                               |                                              | X          |                                              |     |     | X                |            | -         |
| nanoAg45     |                   | X                               |                                                              |                   |                                   |                   |                                                 |                   |                               |                                              | X          |                                              |     |     | X                |            | -         |
| nanoAg46     |                   | X                               |                                                              |                   |                                   |                   |                                                 |                   |                               |                                              | X          |                                              |     |     | X                |            | -         |
| nanoAg47     |                   | X                               |                                                              |                   |                                   |                   |                                                 | X                 |                               |                                              |            |                                              | X   |     | X                |            | -         |
| nanoAg48     |                   | X                               |                                                              |                   |                                   |                   |                                                 |                   | X                             |                                              |            |                                              | X   |     | X                |            | stable    |
| nanoAg49     |                   | X                               |                                                              |                   |                                   |                   |                                                 |                   |                               | X                                            |            |                                              | X   |     | X                |            | -         |
| nanoAg50     |                   | X                               |                                                              |                   |                                   |                   |                                                 | X                 |                               |                                              |            |                                              |     | X   | X                |            | stable    |
| nanoAg51     |                   | X                               |                                                              |                   |                                   |                   |                                                 |                   | X                             |                                              |            |                                              |     | X   | X                |            | -         |
| nanoAg52     |                   | X                               |                                                              |                   |                                   |                   |                                                 |                   |                               | X                                            |            |                                              |     | X   | X                |            | -         |
| nanoAg53     |                   | X                               |                                                              |                   |                                   |                   |                                                 | X                 |                               |                                              |            | X                                            |     |     |                  | X          | -         |
| nanoAg54     |                   | X                               |                                                              |                   |                                   |                   |                                                 |                   | X                             |                                              |            | X                                            |     |     |                  | X          | stable    |

Tabele 1. The composition and stability of the solutions containing silver or copper in an ionic form or nanoparticles (monometallic solutions), cont.

| Sample label | Silver precursor  |                                 |                                                              | Copper precursor  |                                   |                   |                                                 | Reducing agent    |                               |                                              | Stabilizer |                                              |     |     | Solvent          |            | Stability |
|--------------|-------------------|---------------------------------|--------------------------------------------------------------|-------------------|-----------------------------------|-------------------|-------------------------------------------------|-------------------|-------------------------------|----------------------------------------------|------------|----------------------------------------------|-----|-----|------------------|------------|-----------|
|              | AgNO <sub>3</sub> | Ag <sub>2</sub> SO <sub>4</sub> | Ag <sub>3</sub> C <sub>6</sub> H <sub>5</sub> O <sub>7</sub> | CuCl <sub>2</sub> | Cu(NO <sub>3</sub> ) <sub>2</sub> | CuSO <sub>4</sub> | C <sub>4</sub> H <sub>6</sub> O <sub>4</sub> Cu | NaBH <sub>4</sub> | N <sub>2</sub> H <sub>4</sub> | C <sub>6</sub> H <sub>8</sub> O <sub>6</sub> | CTAB       | C <sub>6</sub> H <sub>8</sub> O <sub>7</sub> | PEG | PVP | H <sub>2</sub> O | 2-propanol |           |
| nanoAg55     |                   | X                               |                                                              |                   |                                   |                   |                                                 |                   |                               | X                                            |            | X                                            |     |     |                  | X          | -         |
| nanoAg56     |                   | X                               |                                                              |                   |                                   |                   |                                                 |                   |                               |                                              | X          |                                              |     |     |                  | X          | -         |
| nanoAg57     |                   | X                               |                                                              |                   |                                   |                   |                                                 |                   |                               |                                              | X          |                                              |     |     |                  | X          | -         |
| nanoAg58     |                   | X                               |                                                              |                   |                                   |                   |                                                 |                   |                               |                                              | X          |                                              |     |     |                  | X          | -         |
| nanoAg59     |                   | X                               |                                                              |                   |                                   |                   |                                                 | X                 |                               |                                              |            |                                              | X   |     |                  | X          | -         |
| nanoAg60     |                   | X                               |                                                              |                   |                                   |                   |                                                 |                   | X                             |                                              |            |                                              | X   |     |                  | X          | stable    |
| nanoAg61     |                   | X                               |                                                              |                   |                                   |                   |                                                 |                   |                               | X                                            |            |                                              | X   |     |                  | X          | -         |
| nanoAg62     |                   | X                               |                                                              |                   |                                   |                   |                                                 | X                 |                               |                                              |            |                                              |     | X   |                  | X          | stable    |
| nanoAg63     |                   | X                               |                                                              |                   |                                   |                   |                                                 |                   | X                             |                                              |            |                                              |     | X   |                  | X          | -         |
| nanoAg64     |                   | X                               |                                                              |                   |                                   |                   |                                                 |                   |                               | X                                            |            |                                              |     | X   |                  |            | -         |
| nanoAg65     |                   |                                 | X                                                            |                   |                                   |                   |                                                 |                   |                               |                                              |            | X                                            |     |     | X                |            | -         |
| nanoAg66     |                   |                                 | X                                                            |                   |                                   |                   |                                                 | X                 |                               |                                              |            |                                              |     |     | X                |            | -         |
| nanoAg67     |                   |                                 | X                                                            |                   |                                   |                   |                                                 |                   | X                             |                                              |            |                                              |     |     | X                |            | -         |
| nanoAg68     |                   |                                 | X                                                            |                   |                                   |                   |                                                 |                   |                               | X                                            |            |                                              |     |     | X                |            | -         |
| nanoAg69     |                   |                                 | X                                                            |                   |                                   |                   |                                                 |                   |                               |                                              |            | X                                            |     |     |                  | X          | -         |
| nanoAg70     |                   |                                 | X                                                            |                   |                                   |                   |                                                 | X                 |                               |                                              |            |                                              |     |     |                  | X          | -         |
| nanoAg71     |                   |                                 | X                                                            |                   |                                   |                   |                                                 |                   | X                             |                                              |            |                                              |     |     |                  | X          | -         |
| nanoAg72     |                   |                                 | X                                                            |                   |                                   |                   |                                                 |                   |                               | X                                            |            |                                              |     |     |                  | X          | -         |
| nanoAg73     |                   |                                 | X                                                            |                   |                                   |                   |                                                 | X                 |                               |                                              |            | X                                            |     |     | X                |            | -         |
| nanoAg74     |                   |                                 | X                                                            |                   |                                   |                   |                                                 |                   | X                             |                                              |            | X                                            |     |     | X                |            | stable    |
| nanoAg75     |                   |                                 | X                                                            |                   |                                   |                   |                                                 |                   |                               | X                                            |            | X                                            |     |     | X                |            | -         |
| nanoAg76     |                   |                                 | X                                                            |                   |                                   |                   |                                                 |                   |                               |                                              | X          |                                              |     |     | X                |            | -         |
| nanoAg77     |                   |                                 | X                                                            |                   |                                   |                   |                                                 |                   |                               |                                              | X          |                                              |     |     | X                |            | -         |
| nanoAg78     |                   |                                 | X                                                            |                   |                                   |                   |                                                 |                   |                               |                                              | X          |                                              |     |     | X                |            | -         |
| nanoAg79     |                   |                                 | X                                                            |                   |                                   |                   |                                                 | X                 |                               |                                              |            |                                              | X   |     | X                |            | -         |
| nanoAg80     |                   |                                 | X                                                            |                   |                                   |                   |                                                 |                   | X                             |                                              |            |                                              | X   |     | X                |            | stable    |
| nanoAg81     |                   |                                 | X                                                            |                   |                                   |                   |                                                 |                   |                               | X                                            |            |                                              | X   |     | X                |            | -         |

Table 1. The composition and stability of the solutions containing silver or copper in an ionic form or nanoparticles (monometallic solutions), cont.

| Sample label | Silver precursor  |                                 |                                                              | Copper precursor  |                                   |                   |                                                 | Reducing agent    |                               |                                              | Stabilizer |                                              |     |     | Solvent          |            | Stability |
|--------------|-------------------|---------------------------------|--------------------------------------------------------------|-------------------|-----------------------------------|-------------------|-------------------------------------------------|-------------------|-------------------------------|----------------------------------------------|------------|----------------------------------------------|-----|-----|------------------|------------|-----------|
|              | AgNO <sub>3</sub> | Ag <sub>2</sub> SO <sub>4</sub> | Ag <sub>3</sub> C <sub>6</sub> H <sub>5</sub> O <sub>7</sub> | CuCl <sub>2</sub> | Cu(NO <sub>3</sub> ) <sub>2</sub> | CuSO <sub>4</sub> | C <sub>4</sub> H <sub>6</sub> O <sub>4</sub> Cu | NaBH <sub>4</sub> | N <sub>2</sub> H <sub>4</sub> | C <sub>6</sub> H <sub>8</sub> O <sub>6</sub> | CTAB       | C <sub>6</sub> H <sub>8</sub> O <sub>7</sub> | PEG | PVP | H <sub>2</sub> O | 2-propanol |           |
| nanoAg82     |                   |                                 | X                                                            |                   |                                   |                   |                                                 | X                 |                               |                                              |            |                                              |     | X   | X                |            | stable    |
| nanoAg83     |                   |                                 | X                                                            |                   |                                   |                   |                                                 |                   | X                             |                                              |            |                                              |     | X   | X                |            | -         |
| nanoAg84     |                   |                                 | X                                                            |                   |                                   |                   |                                                 |                   |                               | X                                            |            |                                              |     | X   | X                |            | -         |
| nanoAg85     |                   |                                 | X                                                            |                   |                                   |                   |                                                 | X                 |                               |                                              |            | X                                            |     |     |                  | X          | -         |
| nanoAg86     |                   |                                 | X                                                            |                   |                                   |                   |                                                 |                   | X                             |                                              |            | X                                            |     |     |                  | X          | stable    |
| nanoAg87     |                   |                                 | X                                                            |                   |                                   |                   |                                                 |                   |                               | X                                            |            | X                                            |     |     |                  | X          | -         |
| nanoAg88     |                   |                                 | X                                                            |                   |                                   |                   |                                                 |                   |                               |                                              | X          |                                              |     |     |                  | X          | -         |
| nanoAg89     |                   |                                 | X                                                            |                   |                                   |                   |                                                 |                   |                               |                                              | X          |                                              |     |     |                  | X          | -         |
| nanoAg90     |                   |                                 | X                                                            |                   |                                   |                   |                                                 |                   |                               |                                              | X          |                                              |     |     |                  | X          | -         |
| nanoAg91     |                   |                                 | X                                                            |                   |                                   |                   |                                                 | X                 |                               |                                              |            |                                              | X   |     |                  | X          | -         |
| nanoAg92     |                   |                                 | X                                                            |                   |                                   |                   |                                                 |                   | X                             |                                              |            |                                              | X   |     |                  | X          | stable    |
| nanoAg93     |                   |                                 | X                                                            |                   |                                   |                   |                                                 |                   |                               | X                                            |            |                                              | X   |     |                  | X          | -         |
| nanoAg94     |                   |                                 | X                                                            |                   |                                   |                   |                                                 | X                 |                               |                                              |            |                                              |     | X   |                  | X          | stable    |
| nanoAg95     |                   |                                 | X                                                            |                   |                                   |                   |                                                 |                   | X                             |                                              |            |                                              |     | X   |                  | X          | stable    |
| nanoAg96     |                   |                                 | X                                                            |                   |                                   |                   |                                                 |                   |                               | X                                            |            |                                              |     | X   |                  |            | -         |
| nanoCu97     |                   |                                 |                                                              | X                 |                                   |                   |                                                 |                   |                               |                                              |            | X                                            |     |     | X                |            | stable    |
| nanoCu98     |                   |                                 |                                                              | X                 |                                   |                   |                                                 | X                 |                               |                                              |            |                                              |     |     | X                |            | -         |
| nanoCu99     |                   |                                 |                                                              | X                 |                                   |                   |                                                 |                   | X                             |                                              |            |                                              |     |     | X                |            | -         |
| nanoCu100    |                   |                                 |                                                              | X                 |                                   |                   |                                                 |                   |                               | X                                            |            |                                              |     |     | X                |            | -         |
| nanoCu101    |                   |                                 |                                                              | X                 |                                   |                   |                                                 |                   |                               |                                              |            | X                                            |     |     |                  | X          | stable    |
| nanoCu102    |                   |                                 |                                                              | X                 |                                   |                   |                                                 | X                 |                               |                                              |            |                                              |     |     |                  | X          | -         |
| nanoCu103    |                   |                                 |                                                              | X                 |                                   |                   |                                                 |                   | X                             |                                              |            |                                              |     |     |                  | X          | -         |
| nanoCu104    |                   |                                 |                                                              | X                 |                                   |                   |                                                 |                   |                               | X                                            |            |                                              |     |     |                  | X          | -         |
| nanoCu105    |                   |                                 |                                                              | X                 |                                   |                   |                                                 | X                 |                               |                                              |            | X                                            |     |     | X                |            | -         |
| nanoCu106    |                   |                                 |                                                              | X                 |                                   |                   |                                                 |                   | X                             |                                              |            | X                                            |     |     | X                |            | -         |
| nanoCu107    |                   |                                 |                                                              | X                 |                                   |                   |                                                 |                   |                               | X                                            |            | X                                            |     |     | X                |            | -         |
| nanoCu108    |                   |                                 |                                                              | X                 |                                   |                   |                                                 |                   |                               |                                              | X          |                                              |     |     | X                |            | -         |



Tabele 1. The composition and stability of the solutions containing silver or copper in an ionic form or nanoparticles (monometallic solutions), cont.

| Sample label | Silver precursor  |                                 |                                                              | Copper precursor  |                                   |                   |                                                 | Reducing agent    |                               |                                              | Stabilizer |                                              |     |     | Solvent          |            | Stability |
|--------------|-------------------|---------------------------------|--------------------------------------------------------------|-------------------|-----------------------------------|-------------------|-------------------------------------------------|-------------------|-------------------------------|----------------------------------------------|------------|----------------------------------------------|-----|-----|------------------|------------|-----------|
|              | AgNO <sub>3</sub> | Ag <sub>2</sub> SO <sub>4</sub> | Ag <sub>3</sub> C <sub>6</sub> H <sub>5</sub> O <sub>7</sub> | CuCl <sub>2</sub> | Cu(NO <sub>3</sub> ) <sub>2</sub> | CuSO <sub>4</sub> | C <sub>4</sub> H <sub>6</sub> O <sub>4</sub> Cu | NaBH <sub>4</sub> | N <sub>2</sub> H <sub>4</sub> | C <sub>6</sub> H <sub>8</sub> O <sub>6</sub> | CTAB       | C <sub>6</sub> H <sub>8</sub> O <sub>7</sub> | PEG | PVP | H <sub>2</sub> O | 2-propanol |           |
| nanoCu109    |                   |                                 |                                                              | X                 |                                   |                   |                                                 |                   |                               |                                              | X          |                                              |     |     | X                |            | -         |
| nanoCu110    |                   |                                 |                                                              | X                 |                                   |                   |                                                 |                   |                               |                                              | X          |                                              |     |     | X                |            | -         |
| nanoCu111    |                   |                                 |                                                              | X                 |                                   |                   |                                                 | X                 |                               |                                              |            |                                              | X   |     | X                |            | -         |
| nanoCu112    |                   |                                 |                                                              | X                 |                                   |                   |                                                 |                   | X                             |                                              |            |                                              | X   |     | X                |            | -         |
| nanoCu113    |                   |                                 |                                                              | X                 |                                   |                   |                                                 |                   |                               | X                                            |            |                                              | X   |     | X                |            | stable    |
| nanoCu114    |                   |                                 |                                                              | X                 |                                   |                   |                                                 | X                 |                               |                                              |            |                                              |     | X   | X                |            | stable    |
| nanoCu115    |                   |                                 |                                                              | X                 |                                   |                   |                                                 |                   | X                             |                                              |            |                                              |     | X   | X                |            | stable    |
| nanoCu116    |                   |                                 |                                                              | X                 |                                   |                   |                                                 |                   |                               | X                                            |            |                                              |     | X   | X                |            | stable    |
| nanoCu117    |                   |                                 |                                                              | X                 |                                   |                   |                                                 | X                 |                               |                                              |            | X                                            |     |     |                  | X          | -         |
| nanoCu118    |                   |                                 |                                                              | X                 |                                   |                   |                                                 |                   | X                             |                                              |            | X                                            |     |     |                  | X          | -         |
| nanoCu119    |                   |                                 |                                                              | X                 |                                   |                   |                                                 |                   |                               | X                                            |            | X                                            |     |     |                  | X          | -         |
| nanoCu120    |                   |                                 |                                                              | X                 |                                   |                   |                                                 |                   |                               |                                              | X          |                                              |     |     |                  | X          | -         |
| nanoCu121    |                   |                                 |                                                              | X                 |                                   |                   |                                                 |                   |                               |                                              | X          |                                              |     |     |                  | X          | stable    |
| nanoCu122    |                   |                                 |                                                              | X                 |                                   |                   |                                                 |                   |                               |                                              | X          |                                              |     |     |                  | X          | stable    |
| nanoCu123    |                   |                                 |                                                              | X                 |                                   |                   |                                                 | X                 |                               |                                              |            |                                              | X   |     |                  | X          | -         |
| nanoCu124    |                   |                                 |                                                              | X                 |                                   |                   |                                                 |                   | X                             |                                              |            |                                              | X   |     |                  | X          | -         |
| nanoCu125    |                   |                                 |                                                              | X                 |                                   |                   |                                                 |                   |                               | X                                            |            |                                              | X   |     |                  | X          | -         |
| nanoCu126    |                   |                                 |                                                              | X                 |                                   |                   |                                                 | X                 |                               |                                              |            |                                              |     | X   |                  | X          | stable    |
| nanoCu127    |                   |                                 |                                                              | X                 |                                   |                   |                                                 |                   | X                             |                                              |            |                                              |     | X   |                  | X          | stable    |
| nanoCu128    |                   |                                 |                                                              | X                 |                                   |                   |                                                 |                   |                               | X                                            |            |                                              |     | X   |                  |            | stable    |
| nanoCu129    |                   |                                 |                                                              |                   | X                                 |                   |                                                 |                   |                               |                                              |            | X                                            |     |     | X                |            | stable    |
| nanoCu130    |                   |                                 |                                                              |                   | X                                 |                   |                                                 | X                 |                               |                                              |            |                                              |     |     | X                |            | -         |
| nanoCu131    |                   |                                 |                                                              |                   | X                                 |                   |                                                 |                   | X                             |                                              |            |                                              |     |     | X                |            | -         |
| nanoCu132    |                   |                                 |                                                              |                   | X                                 |                   |                                                 |                   |                               | X                                            |            |                                              |     |     | X                |            | -         |
| nanoCu133    |                   |                                 |                                                              |                   | X                                 |                   |                                                 |                   |                               |                                              |            | X                                            |     |     |                  | X          | stable    |
| nanoCu134    |                   |                                 |                                                              |                   | X                                 |                   |                                                 | X                 |                               |                                              |            |                                              |     |     |                  | X          | -         |
| nanoCu135    |                   |                                 |                                                              |                   | X                                 |                   |                                                 |                   | X                             |                                              |            |                                              |     |     |                  | X          | -         |



Table 1. The composition and stability of the solutions containing silver or copper in an ionic form or nanoparticles (monometallic solutions), cont.

| Sample label | Silver precursor  |                                 |                                                              | Copper precursor  |                                   |                   |                                                 | Reducing agent    |                               |                                              | Stabilizer |                                              |     |     | Solvent          |            | Stability |
|--------------|-------------------|---------------------------------|--------------------------------------------------------------|-------------------|-----------------------------------|-------------------|-------------------------------------------------|-------------------|-------------------------------|----------------------------------------------|------------|----------------------------------------------|-----|-----|------------------|------------|-----------|
|              | AgNO <sub>3</sub> | Ag <sub>2</sub> SO <sub>4</sub> | Ag <sub>3</sub> C <sub>6</sub> H <sub>5</sub> O <sub>7</sub> | CuCl <sub>2</sub> | Cu(NO <sub>3</sub> ) <sub>2</sub> | CuSO <sub>4</sub> | C <sub>4</sub> H <sub>6</sub> O <sub>4</sub> Cu | NaBH <sub>4</sub> | N <sub>2</sub> H <sub>4</sub> | C <sub>6</sub> H <sub>8</sub> O <sub>6</sub> | CTAB       | C <sub>6</sub> H <sub>8</sub> O <sub>7</sub> | PEG | PVP | H <sub>2</sub> O | 2-propanol |           |
| nanoCu163    |                   |                                 |                                                              |                   |                                   | X                 |                                                 |                   | X                             |                                              |            |                                              |     |     | X                |            | -         |
| nanoCu164    |                   |                                 |                                                              |                   |                                   | X                 |                                                 |                   |                               | X                                            |            |                                              |     |     | X                |            | -         |
| nanoCu165    |                   |                                 |                                                              |                   |                                   | X                 |                                                 |                   |                               |                                              |            | X                                            |     |     |                  | X          | -         |
| nanoCu166    |                   |                                 |                                                              |                   |                                   | X                 |                                                 | X                 |                               |                                              |            |                                              |     |     |                  | X          | -         |
| nanoCu167    |                   |                                 |                                                              |                   |                                   | X                 |                                                 |                   | X                             |                                              |            |                                              |     |     |                  | X          | -         |
| nanoCu168    |                   |                                 |                                                              |                   |                                   | X                 |                                                 |                   |                               | X                                            |            |                                              |     |     |                  | X          | -         |
| nanoCu169    |                   |                                 |                                                              |                   |                                   | X                 |                                                 | X                 |                               |                                              |            | X                                            |     |     | X                |            | stable    |
| nanoCu170    |                   |                                 |                                                              |                   |                                   | X                 |                                                 |                   | X                             |                                              |            | X                                            |     |     | X                |            | stable    |
| nanoCu171    |                   |                                 |                                                              |                   |                                   | X                 |                                                 |                   |                               | X                                            |            | X                                            |     |     | X                |            | stable    |
| nanoCu172    |                   |                                 |                                                              |                   |                                   | X                 |                                                 |                   |                               |                                              | X          |                                              |     |     | X                |            | -         |
| nanoCu173    |                   |                                 |                                                              |                   |                                   | X                 |                                                 |                   |                               |                                              | X          |                                              |     |     | X                |            | -         |
| nanoCu174    |                   |                                 |                                                              |                   |                                   | X                 |                                                 |                   |                               |                                              | X          |                                              |     |     | X                |            | -         |
| nanoCu175    |                   |                                 |                                                              |                   |                                   | X                 |                                                 | X                 |                               |                                              |            |                                              | X   |     | X                |            | -         |
| nanoCu176    |                   |                                 |                                                              |                   |                                   | X                 |                                                 |                   | X                             |                                              |            |                                              | X   |     | X                |            | -         |
| nanoCu177    |                   |                                 |                                                              |                   |                                   | X                 |                                                 |                   |                               | X                                            |            |                                              | X   |     | X                |            | -         |
| nanoCu178    |                   |                                 |                                                              |                   |                                   | X                 |                                                 | X                 |                               |                                              |            |                                              |     | X   | X                |            | -         |
| nanoCu179    |                   |                                 |                                                              |                   |                                   | X                 |                                                 |                   | X                             |                                              |            |                                              |     | X   | X                |            | -         |
| nanoCu180    |                   |                                 |                                                              |                   |                                   | X                 |                                                 |                   |                               | X                                            |            |                                              |     | X   | X                |            | stable    |
| nanoCu181    |                   |                                 |                                                              |                   |                                   | X                 |                                                 | X                 |                               |                                              |            | X                                            |     |     |                  | X          | stable    |
| nanoCu182    |                   |                                 |                                                              |                   |                                   | X                 |                                                 |                   | X                             |                                              |            | X                                            |     |     |                  | X          | stable    |
| nanoCu183    |                   |                                 |                                                              |                   |                                   | X                 |                                                 |                   |                               | X                                            |            | X                                            |     |     |                  | X          | stable    |
| nanoCu184    |                   |                                 |                                                              |                   |                                   | X                 |                                                 |                   |                               |                                              | X          |                                              |     |     |                  | X          | -         |
| nanoCu185    |                   |                                 |                                                              |                   |                                   | X                 |                                                 |                   |                               |                                              | X          |                                              |     |     |                  | X          | -         |
| nanoCu186    |                   |                                 |                                                              |                   |                                   | X                 |                                                 |                   |                               |                                              | X          |                                              |     |     |                  | X          | -         |
| nanoCu187    |                   |                                 |                                                              |                   |                                   | X                 |                                                 | X                 |                               |                                              |            |                                              | X   |     |                  | X          | -         |
| nanoCu188    |                   |                                 |                                                              |                   |                                   | X                 |                                                 |                   | X                             |                                              |            |                                              | X   |     |                  | X          | -         |
| nanoCu189    |                   |                                 |                                                              |                   |                                   | X                 |                                                 |                   |                               | X                                            |            |                                              | X   |     |                  | X          | stable    |

Table 1. The composition and stability of the solutions containing silver or copper in an ionic form or nanoparticles (monometallic solutions), cont.

| Sample label | Silver precursor  |                                 |                                                              | Copper precursor  |                                   |                   |                                                 | Reducing agent    |                               |                                              | Stabilizer |                                              |     |     | Solvent          |            | Stability |
|--------------|-------------------|---------------------------------|--------------------------------------------------------------|-------------------|-----------------------------------|-------------------|-------------------------------------------------|-------------------|-------------------------------|----------------------------------------------|------------|----------------------------------------------|-----|-----|------------------|------------|-----------|
|              | AgNO <sub>3</sub> | Ag <sub>2</sub> SO <sub>4</sub> | Ag <sub>3</sub> C <sub>6</sub> H <sub>5</sub> O <sub>7</sub> | CuCl <sub>2</sub> | Cu(NO <sub>3</sub> ) <sub>2</sub> | CuSO <sub>4</sub> | C <sub>4</sub> H <sub>6</sub> O <sub>4</sub> Cu | NaBH <sub>4</sub> | N <sub>2</sub> H <sub>4</sub> | C <sub>6</sub> H <sub>8</sub> O <sub>6</sub> | CTAB       | C <sub>6</sub> H <sub>8</sub> O <sub>7</sub> | PEG | PVP | H <sub>2</sub> O | 2-propanol |           |
| nanoCu190    |                   |                                 |                                                              |                   |                                   | X                 |                                                 | X                 |                               |                                              |            |                                              |     | X   |                  | X          | -         |
| nanoCu191    |                   |                                 |                                                              |                   |                                   | X                 |                                                 |                   | X                             |                                              |            |                                              |     | X   |                  | X          | -         |
| nanoCu192    |                   |                                 |                                                              |                   |                                   | X                 |                                                 |                   |                               | X                                            |            |                                              |     | X   |                  |            | stable    |
| nanoCu193    |                   |                                 |                                                              |                   |                                   |                   | X                                               |                   |                               |                                              |            | X                                            |     |     | X                |            | -         |
| nanoCu194    |                   |                                 |                                                              |                   |                                   |                   | X                                               | X                 |                               |                                              |            |                                              |     |     | X                |            | -         |
| nanoCu195    |                   |                                 |                                                              |                   |                                   |                   | X                                               |                   | X                             |                                              |            |                                              |     |     | X                |            | -         |
| nanoCu196    |                   |                                 |                                                              |                   |                                   |                   | X                                               |                   |                               | X                                            |            |                                              |     |     | X                |            | -         |
| nanoCu197    |                   |                                 |                                                              |                   |                                   |                   | X                                               |                   |                               |                                              |            | X                                            |     |     |                  | X          | -         |
| nanoCu198    |                   |                                 |                                                              |                   |                                   |                   | X                                               | X                 |                               |                                              |            |                                              |     |     |                  | X          | -         |
| nanoCu199    |                   |                                 |                                                              |                   |                                   |                   | X                                               |                   | X                             |                                              |            |                                              |     |     |                  | X          | -         |
| nanoCu200    |                   |                                 |                                                              |                   |                                   |                   | X                                               |                   |                               | X                                            |            |                                              |     |     |                  | X          | -         |
| nanoCu201    |                   |                                 |                                                              |                   |                                   |                   | X                                               | X                 |                               |                                              |            | X                                            |     |     | X                |            | stable    |
| nanoCu202    |                   |                                 |                                                              |                   |                                   |                   | X                                               |                   | X                             |                                              |            | X                                            |     |     | X                |            | stable    |
| nanoCu203    |                   |                                 |                                                              |                   |                                   |                   | X                                               |                   |                               | X                                            |            | X                                            |     |     | X                |            | stable    |
| nanoCu204    |                   |                                 |                                                              |                   |                                   |                   | X                                               |                   |                               |                                              | X          |                                              |     |     | X                |            | -         |
| nanoCu205    |                   |                                 |                                                              |                   |                                   |                   | X                                               |                   |                               |                                              | X          |                                              |     |     | X                |            | -         |
| nanoCu206    |                   |                                 |                                                              |                   |                                   |                   | X                                               |                   |                               |                                              | X          |                                              |     |     | X                |            | -         |
| nanoCu207    |                   |                                 |                                                              |                   |                                   |                   | X                                               | X                 |                               |                                              |            |                                              | X   |     | X                |            | -         |
| nanoCu208    |                   |                                 |                                                              |                   |                                   |                   | X                                               |                   | X                             |                                              |            |                                              | X   |     | X                |            | stable    |
| nanoCu209    |                   |                                 |                                                              |                   |                                   |                   | X                                               |                   |                               | X                                            |            |                                              | X   |     | X                |            | -         |
| nanoCu210    |                   |                                 |                                                              |                   |                                   |                   | X                                               | X                 |                               |                                              |            |                                              |     | X   | X                |            | stable    |
| nanoCu211    |                   |                                 |                                                              |                   |                                   |                   | X                                               |                   | X                             |                                              |            |                                              |     | X   | X                |            | stable    |
| nanoCu212    |                   |                                 |                                                              |                   |                                   |                   | X                                               |                   |                               | X                                            |            |                                              |     | X   | X                |            | stable    |
| nanoCu213    |                   |                                 |                                                              |                   |                                   |                   | X                                               | X                 |                               |                                              |            | X                                            |     |     |                  | X          | stable    |
| nanoCu214    |                   |                                 |                                                              |                   |                                   |                   | X                                               |                   | X                             |                                              |            | X                                            |     |     |                  | X          | stable    |
| nanoCu215    |                   |                                 |                                                              |                   |                                   |                   | X                                               |                   |                               | X                                            |            | X                                            |     |     |                  | X          | stable    |
| nanoCu216    |                   |                                 |                                                              |                   |                                   |                   | X                                               |                   |                               |                                              | X          |                                              |     |     |                  | X          | -         |

Table 1. The composition and stability of the solutions containing silver or copper in an ionic form or nanoparticles (monometallic solutions), cont.

| Sample label | Silver precursor  |                                 |                                                              | Copper precursor  |                                   |                   |                                                 | Reducing agent    |                               |                                              | Stabilizer |                                              |     |     | Solvent          |            | Stability |
|--------------|-------------------|---------------------------------|--------------------------------------------------------------|-------------------|-----------------------------------|-------------------|-------------------------------------------------|-------------------|-------------------------------|----------------------------------------------|------------|----------------------------------------------|-----|-----|------------------|------------|-----------|
|              | AgNO <sub>3</sub> | Ag <sub>2</sub> SO <sub>4</sub> | Ag <sub>3</sub> C <sub>6</sub> H <sub>5</sub> O <sub>7</sub> | CuCl <sub>2</sub> | Cu(NO <sub>3</sub> ) <sub>2</sub> | CuSO <sub>4</sub> | C <sub>4</sub> H <sub>6</sub> O <sub>4</sub> Cu | NaBH <sub>4</sub> | N <sub>2</sub> H <sub>4</sub> | C <sub>6</sub> H <sub>8</sub> O <sub>6</sub> | CTAB       | C <sub>6</sub> H <sub>8</sub> O <sub>7</sub> | PEG | PVP | H <sub>2</sub> O | 2-propanol |           |
| nanoCu217    |                   |                                 |                                                              |                   |                                   |                   | X                                               |                   |                               |                                              | X          |                                              |     |     |                  | X          | -         |
| nanoCu218    |                   |                                 |                                                              |                   |                                   |                   | X                                               |                   |                               |                                              | X          |                                              |     |     |                  | X          | -         |
| nanoCu219    |                   |                                 |                                                              |                   |                                   |                   | X                                               | X                 |                               |                                              |            |                                              | X   |     |                  | X          | stable    |
| nanoCu220    |                   |                                 |                                                              |                   |                                   |                   | X                                               |                   | X                             |                                              |            |                                              | X   |     |                  | X          | stable    |
| nanoCu221    |                   |                                 |                                                              |                   |                                   |                   | X                                               |                   |                               | X                                            |            |                                              | X   |     |                  | X          | -         |
| nanoCu222    |                   |                                 |                                                              |                   |                                   |                   | X                                               | X                 |                               |                                              |            |                                              |     | X   |                  | X          | stable    |
| nanoCu223    |                   |                                 |                                                              |                   |                                   |                   | X                                               |                   | X                             |                                              |            |                                              |     | X   |                  | X          | stable    |
| nanoCu224    |                   |                                 |                                                              |                   |                                   |                   | X                                               |                   |                               | X                                            |            |                                              |     | X   |                  |            | stable    |

**Legend:**

- AgNO<sub>3</sub> – silver nitrate
- Ag<sub>2</sub>SO<sub>4</sub> – silver sulfate
- Ag<sub>3</sub>C<sub>6</sub>H<sub>5</sub>O<sub>7</sub> - silver citrate
- CuCl<sub>2</sub> - copper chloride
- Cu(NO<sub>3</sub>)<sub>2</sub> – copper nitrate
- CuSO<sub>4</sub>– copper sulfate
- C<sub>4</sub>H<sub>6</sub>O<sub>4</sub>Cu - copper acetate
- NaBH<sub>4</sub> - sodium borohydride
- N<sub>2</sub>H<sub>4</sub> – hydrazine
- C<sub>6</sub>H<sub>8</sub>O - ascorbic acid
- CTAB - cetyltrimethylammonium bromide
- C<sub>6</sub>H<sub>8</sub>O<sub>7</sub>- citric acid
- PEG - polyethylene glycol
- PVP - polyvinylpyrrolidone
